# Supplementary material for: Towards the understanding of the effect of oxygen on the electrocatalytic activity of microbial biofilms: a spectroelectrochemical study
Source: Royal Society of Chemistry journal article supplement (doi:10.1039/c5ra17429e), 2015-01-01
Supplement: c5ra17429e1.pdf [file c5ra17429e1.pdf]

## Electronic Supporting Information

### Towards the understanding of the effect of oxygen on the electrocatalytic activity of microbial biofilms: a spectroelectrochemical study

D. Millo<sup>\*a</sup> and H. K. Ly<sup>b</sup>

*a. Department of Physics and Astronomy, VU University Amsterdam, De Boelelaan 1081, 1081 HV Amsterdam, The Netherlands.*

*b. Technische Universität Berlin, Institut für Chemie, Straße des 17. Juni 135, D-10623 Berlin, Germany.*

#### Oxygen-driven oxidation of a ferrous cytochrome

The formal reduction potentials of molecular oxygen (O<sub>2</sub>) and the outer membrane cytochromes (OMCs) are +0.16 and -0.36 V vs. SCE, respectively. [Millo et al., *Angew. Chemie - Int. Ed.*, **2011**, 50, 2625–2627] Therefore, the oxidation of a ferrous (Fe<sup>2+</sup>) OMC by O<sub>2</sub> is a thermodynamically favoured process. To prove whether O<sub>2</sub> can effectively oxidize a ferrous cytochrome, we performed the following experiment. Cytochrome b5 (cyt b5), hereby chosen because it has the same His-Fe-His axial ligation as the OMCs studied in this work [Sezer et al., *Phys. Chem. Chem. Phys.* **2010**, 12, 7894-7903], was chemically reduced to the ferrous state and then exposed to O<sub>2</sub>. Changes in oxidation state were monitored by resonance Raman spectroscopy.

A cyt b5 domain of human sulphite oxidase was used as test protein. Purification and preparation of the protein described elsewhere. [Sivanesanat al. *J. Phys. Chem. B* **2013**, 117, 11866–11872] The protein as received was in the ferric (Fe<sup>3+</sup>) state, as reflected by the  $\nu_4$ ,  $\nu_3$ , and  $\nu_{10}$  bands at 1374, 1507, and 1640 cm<sup>-1</sup> (Figure ESI 1, bottom spectrum). Adding sodium dithionite (Sigma Aldrich, > 85 %, molar ratio 10 : 1) to the solution reduced the protein as shown by the downshift of the  $\nu_4$  and  $\nu_3$  bands to 1361 and 1494 cm<sup>-1</sup>, respectively, and the absence of the  $\nu_{10}$  band, which is a distinctive trademark of His-Fe<sup>2+</sup>-His cytochromes (Figure ESI 1, middle spectrum). Bubbling the solution containing the cyt b5 with O<sub>2</sub> (Linde Gas, grade 5) led to the immediate (i.e. within 10 s) oxidation of the protein, as can be seen in the top spectrum of Figure ESI 1, which is essentially identical to the bottom one. This experiment proves that O<sub>2</sub> can oxidize a ferrous cytochrome having the His-Fe<sup>2+</sup>-His axial ligation, thus reinforcing our conclusions on the direct O<sub>2</sub>-driven oxidation of the OMCs observed in our work.

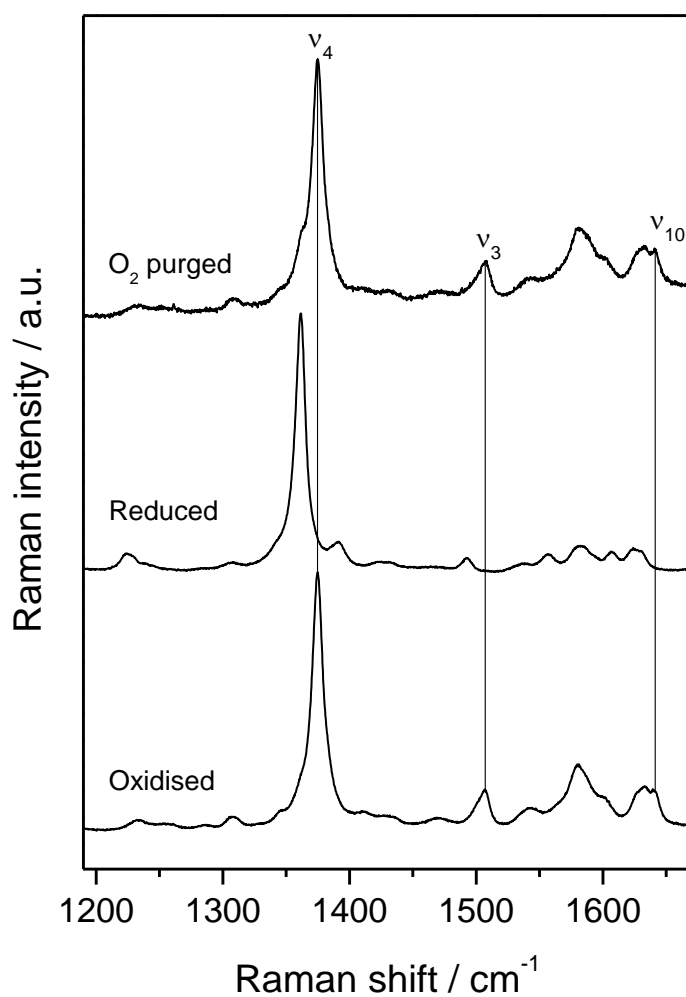

**Figure ESI 1:** Resonance Raman spectra of 50  $\mu\text{M}$  cyt b5 in 10 mM potassium phosphate buffer solution, pH 7.0. Spectra were obtained with a 413 nm laser excitation using the apparatus described elsewhere.[Wackerbarth et al., *Appl. Spectrosc.* **1999**, 53 (3), 283–291; Ly et al., *J. Electroanal. Chem.* **2010**, 660(2), 367-376] Acquisition time was 60 s and laser power on the sample was 2 mW. To help the eyes, spectra were normalized with respect to the intensity of the v<sub>4</sub> band.
